# Supplementary material
Source: publisher figshare collection journal article supplement (https://acs.figshare.com/ndownloader/files/3586035)
Supplement: Supplementary file 1 [file 3586035]

# **Supporting Information**

## **Independence of Primary and Secondary Structures in Periodic Precipitation Patterns**

Stoyan K. Smoukov, István Lagzi, and Bartosz A. Grzybowski

Department of Chemical and Biological Engineering and Department of Chemistry,  
Northwestern University, 2145 Sheridan Road, Evanston, Illinois 60208-3113 (USA)

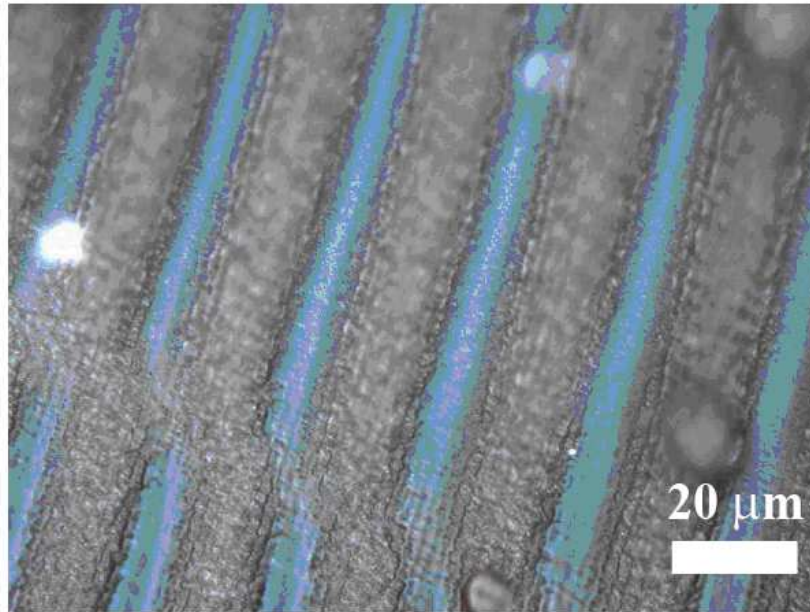

**Figure S1.** Independent formation of primary and secondary bands in a Liesegang system: the secondary patterns are continuous across the fork-defects of the primary bands.
